# Supplementary material for: Exploring Factors That Affected Student Well-Being during the COVID-19 Pandemic: A Comparison of Data-Mining Approaches
Source: Int J Environ Res Public Health. 2022 Sep 7;19(18):11267. doi: 10.3390/ijerph191811267 (PMC9517244; doi:10.3390/ijerph191811267)
Supplement: Supplementary file 1 [file ijerph-19-11267-s001.zip › ijerph-1822562-SI.pdf]

**Table S1.** REDS student questionnaire.

| Question | Item    | Description                                                                                                                         |
|----------|---------|-------------------------------------------------------------------------------------------------------------------------------------|
| Q1       | IS1G01  | Where did you attend school lessons during the COVID-19 disruption?                                                                 |
| Q2       | -       | During the COVID-19 disruption, did you have access to the following ICT devices at home?                                           |
|          | IS1G02A | Desktop or laptop computers                                                                                                         |
|          | IS1G02B | Tablet devices (e.g. iPad, Tablet PC)                                                                                               |
|          | IS1G02C | Smart phones                                                                                                                        |
| Q3       | IS1G03  | During the COVID-19 disruption, did you have access to the internet at home?                                                        |
| Q4       | -       | In comparison with the time before the COVID-19 disruption, how much did your use of the following resources for schoolwork change? |
|          | IS1G04A | Desktop or laptop computers                                                                                                         |
|          | IS1G04B | Tablet devices (e.g. iPad, Tablet PC)                                                                                               |
|          | IS1G04C | Smart phones                                                                                                                        |
|          | IS1G04D | Internet                                                                                                                            |
|          | IS1G04E | Printed resources (e.g., text books, library books, work sheets)                                                                    |
|          | IS1G04F | Lessons provided as radio broadcasts                                                                                                |
|          | IS1G04G | Lessons provided as television broadcasts                                                                                           |
| Q5       | -       | During the COVID-19 disruption, which of the following devices did you use at home?                                                 |
|          | IS1G05A | A computer or tablet device used only by me                                                                                         |
|          | IS1G05B | A computer or tablet device that was shared with others in my home                                                                  |
|          | IS1G05C | A smart phone                                                                                                                       |
| Q6       | IS1G06  | During the COVID-19 disruption, how much of the schoolwork you completed at home was done using pen/pencil and paper?               |
| Q7       | -       | Before, during and after the COVID-19 disruption, how well could you do each of the following tasks?                                |
|          | IS1G07A | Connect a device to the internet                                                                                                    |
|          | IS1G07B | Send and receive email                                                                                                              |
|          | IS1G07C | Log into my school portal or learning system                                                                                        |
|          | IS1G07D | Take photos, or record video or audio of my learning                                                                                |
|          | IS1G07E | Manage settings on a device to access school software                                                                               |
|          | IS1G07F | Send photos, videos or audio of my learning                                                                                         |
|          | IS1G07G | Seesaw and Google classrooms to communicate with my teacher                                                                         |
|          | IS1G07H | Maintain devices (e.g. Update apps, check storage space)                                                                            |
|          | IS1G07I | Fix problems when my device is not working properly                                                                                 |
|          | IS1G07J | Sending and receiving text, audio or video messages (e.g. using WhatsApp)                                                           |
| Q8       | IS1G08  | Think about the computer applications (software) that you used in your lessons and schoolwork during the COVID-19 disruption        |
| Q9       | -       | During the COVID-19 disruption, how often did you use the following forms of communication with your teachers and classmates?       |
|          | IS1G09A | Videoconferencing (e.g. using Zoom, MS Teams) with the whole class for an entire lesson/period                                      |
|          | IS1G09B | Videoconferencing (e.g. using Zoom, MS Teams) with the whole class for part (but not all) of my normal lesson/period                |
|          | IS1G09C | Videoconferencing (e.g. using Zoom, MS Teams) with my teacher and small groups of students                                          |
|          | IS1G09D | Sharing ideas about our schoolwork with other students using a computer                                                             |
|          | IS1G09E | Individual videoconferencing (e.g. Using Zoom, MS Teams) with a teacher                                                             |

|     |         |                                                                                                                                             |
|-----|---------|---------------------------------------------------------------------------------------------------------------------------------------------|
|     | IS1G09F | Communicating with a teacher using emails                                                                                                   |
|     | IS1G09G | Having a phone conversation with a teacher                                                                                                  |
|     | IS1G09H | Receiving materials on the computer that I needed to print (e.g. worksheets or reference material)                                          |
|     | IS1G09I | Receiving printed materials from my school (e.g. worksheets or reference material)                                                          |
|     | IS1G09J | Receiving short instructional videos (e.g. how to complete a practical task or an explanation of a topic)                                   |
|     | IS1G09K | Receiving information/materials related to my schoolwork through Radio or TV                                                                |
|     | IS1G09L | Communicating with a teacher using a messaging service such as WhatsApp                                                                     |
| Q10 | -       | During the COVID-19 disruption, how much did you like using each of the following forms of communication with your teachers and classmates? |
|     | IS1G10A | Videoconferencing (e.g. using Zoom, MS Teams) with the whole class for an entire lesson/period                                              |
|     | IS1G10B | Videoconferencing (e.g. using Zoom, MS Teams) with the whole class for part (but not all) of my normal lesson/period                        |
|     | IS1G10C | Videoconferencing (e.g. using Zoom, MS Teams) with my teacher and small groups of students                                                  |
|     | IS1G10D | Sharing ideas about our schoolwork with other students using a computer                                                                     |
|     | IS1G10E | Individual videoconferencing (e.g. Using Zoom, MS Teams) with a teacher                                                                     |
|     | IS1G10F | Communicating with a teacher using emails                                                                                                   |
|     | IS1G10G | Having a phone conversation with a teacher                                                                                                  |
|     | IS1G09H | Receiving materials on the computer that I needed to print (e.g. worksheets or reference material)                                          |
|     | IS1G10I | Receiving printed materials from my school (e.g. worksheets or reference material)                                                          |
|     | IS1G10J | Receiving short instructional videos (e.g. how to complete a practical task or an explanation of a topic)                                   |
|     | IS1G10K | Receiving information/materials related to my schoolwork through Radio or TV                                                                |
|     | IS1G10L | Communicating with a teacher using a messaging service such as WhatsApp                                                                     |
| Q11 | -       | During the COVID-19 disruption, how often did you receive materials for your lessons in the following ways?                                 |
|     | IS1G11A | They were delivered to me by post, school staff or another member of the community (e.g. Another parent)                                    |
|     | IS1G11B | I collected them directly from the school                                                                                                   |
|     | IS1G11C | I used a school-based online platform e.g. Compass, Seesaw                                                                                  |
|     | IS1G11D | I received them by email                                                                                                                    |
|     | IS1G11E | They were sent by other online methods (e.g. Through Google Drive, Microsoft One Drive)                                                     |
|     | IS1G11F | I received them through a messaging service such as WhatsApp                                                                                |
| Q12 | -       | During the COVID-19 disruption, how often did you do the following activities related to your schoolwork?                                   |
|     | IS1G12A | Research on the internet                                                                                                                    |
|     | IS1G12B | Work from textbooks                                                                                                                         |
|     | IS1G12C | Performance (dancing, role play) or physical activities                                                                                     |
|     | IS1G12D | Activities where I used common household items to build models or experiments                                                               |
|     | IS1G12E | Revision of work from lessons completed before the COVID-19 disruption                                                                      |
|     | IS1G12F | Working with other students                                                                                                                 |
|     | IS1G12G | Asking for help from parents/guardians, other adults or other members of my family                                                          |
| Q13 | -       | During the COVID-19 disruption, how often did you use the following learning resources when doing schoolwork or attending lessons?          |
|     | IS1G13A | Tutorial software or practice programs                                                                                                      |
|     | IS1G13B | Computer-based information resources (e.g. websites, wikis, encyclopaedia)                                                                  |
|     | IS1G13C | Interactive digital learning resources (e.g. learning games or applications)                                                                |

|     |         |                                                                                                                             |
|-----|---------|-----------------------------------------------------------------------------------------------------------------------------|
|     | IS1G13D | Digital textbooks                                                                                                           |
|     | IS1G13E | Printed textbooks                                                                                                           |
|     | IS1G13F | Printed worksheets                                                                                                          |
| Q14 | -       | To what extent do you agree or disagree with the following statements about your learning during the COVID-19 disruption?   |
|     | IS1G14A | I found it hard to understand the schoolwork my teachers gave me                                                            |
|     | IS1G14B | I learned more studying at home than when attending regular lessons at school                                               |
|     | IS1G14C | I was able to complete my schoolwork without having to ask anyone to help me                                                |
|     | IS1G14D | I was unable to get help for my schoolwork from a teacher or school support staff                                           |
|     | IS1G14E | I needed other people at home to help me complete my schoolwork                                                             |
|     | IS1G14F | I needed to contact my classmates to help me complete my schoolwork                                                         |
|     | IS1G14G | I found it difficult to get extra or different types of work from my teachers                                               |
|     | IS1G14H | I only did the work that I had to submit to my teacher                                                                      |
|     | IS1G14I | I got higher grades than before the COVID-19 disruption                                                                     |
| Q15 | -       | During the COVID-19 disruption, who was available to help you with your schoolwork at home?                                 |
|     | IS1G15A | My parent(s) or guardian(s) was/were available and could help me with my schoolwork                                         |
|     | IS1G15B | Older siblings were available and could help me with my schoolwork                                                          |
|     | IS1G15C | People other than my parents/guardians or siblings were available and could help me with my schoolwork                      |
|     | IS1G15D | There was no one available who could help me with my schoolwork                                                             |
| Q16 | -       | During the COVID-19 disruption, how much additional help did you receive with your schoolwork from other people?            |
|     | IS1G16A | Help to find or access my schoolwork on computer                                                                            |
|     | IS1G16B | Help to plan my schoolwork for the day                                                                                      |
|     | IS1G16C | Explanations of my schoolwork when needed                                                                                   |
|     | IS1G16D | Study advice or tips                                                                                                        |
|     | IS1G16E | Help to do research                                                                                                         |
|     | IS1G16F | Encouragement to stay on task                                                                                               |
|     | IS1G16G | Help to use the school computer systems (e.g. email, learning management system)                                            |
|     | IS1G16H | Teaching of additional skills that were not part of my school assignments                                                   |
| Q17 | -       | For how much of the time during the COVID-19 disruption do each of the following statements apply to your learning at home? |
|     | IS1G17A | I had a quiet space to work with a desk and chair                                                                           |
|     | IS1G17B | I felt safer at home than I usually feel at school                                                                          |
|     | IS1G17C | I had to look after my siblings                                                                                             |
|     | IS1G17D | I had to look after a sick or elderly relative                                                                              |
|     | IS1G17E | I felt I did not have the things I needed to complete my schoolwork at home                                                 |
|     | IS1G17F | I was happy to be at home                                                                                                   |
|     | IS1G17G | I missed meals at home because I rely on the meals/breakfast/lunch offered at school                                        |
| Q18 | -       | During the COVID-19 disruption, did the following aspects of your schoolwork change?                                        |
|     | IS1G18A | My motivation to complete my schoolwork                                                                                     |
|     | IS1G18B | The variety of schoolwork I was given                                                                                       |

|     |         |                                                                                                                                                          |
|-----|---------|----------------------------------------------------------------------------------------------------------------------------------------------------------|
|     | IS1G18C | My capacity to plan the completion of my schoolwork                                                                                                      |
|     | IS1G18D | The quality of my schoolwork                                                                                                                             |
|     | IS1G18E | The amount of help I got from my parents/other family members with my schoolwork                                                                         |
|     | IS1G18F | The amount of distraction whilst completing my schoolwork                                                                                                |
|     | IS1G18G | My ability to keep up with my schoolwork                                                                                                                 |
|     | IS1G18H | My confidence in completing schoolwork                                                                                                                   |
|     | IS1G18I | My contribution to class discussions                                                                                                                     |
|     | IS1G18J | My skills in accessing online learning content                                                                                                           |
| Q19 | -       | Think about your workload in a typical school week during the COVID-19 disruption. How much work did you submit to teachers in the learning areas below? |
|     | IS1G19A | Language Arts: test language                                                                                                                             |
|     | IS1G19B | Language arts: foreign or other national languages                                                                                                       |
|     | IS1G19C | Mathematics Add any appropriate national examples                                                                                                        |
|     | IS1G19D | Sciences (general science and/or physics, chemistry, biology, geology, earth sciences, technical science)                                                |
|     | IS1G19E | Human sciences / Humanities /Social Studies (history, geography, civics, law, economics, etc.)                                                           |
|     | IS1G19F | Creative arts (visual arts, music, dance, drama, etc.)                                                                                                   |
|     | IS1G19G | Information technology, computer studies or similar                                                                                                      |
|     | IS1G19H | Practical and vocational subjects Add any appropriate national examples                                                                                  |
|     | IS1G19I | Other (e.g. moral/ethics, physical education, personal and social development)                                                                           |
| Q20 | -       |                                                                                                                                                          |
|     | IS1G20A | Spoken feedback given to me individually                                                                                                                 |
|     | IS1G20B | Spoken feedback given to small groups                                                                                                                    |
|     | IS1G20C | Spoken feedback given to the whole class                                                                                                                 |
|     | IS1G20D | Scores/grades                                                                                                                                            |
|     | IS1G20E | Written feedback on my work                                                                                                                              |
|     | IS1G20F | Written or spoken feedback recorded through the school-based learning management apps e.g. Google Classroom, Seesaw                                      |
| Q21 | -       | To what extent do you agree or disagree with the following statements about the support you received from your teachers during the COVID-19 disruption?  |
|     | IS1G21A | My teachers were available when I needed their help                                                                                                      |
|     | IS1G21B | My teachers made it clear how to best contact them                                                                                                       |
|     | IS1G21C | My teachers gave me feedback that I could understand                                                                                                     |
|     | IS1G21D | My teachers made a special effort to keep in contact with me                                                                                             |
|     | IS1G21E | My teachers showed interest in my learning                                                                                                               |
|     | IS1G21F | I had a good relationship with my teachers                                                                                                               |
|     | IS1G21G | My teachers encouraged me to learn                                                                                                                       |
|     | IS1G21H | My teachers adapted my schoolwork to meet my individual needs                                                                                            |
| Q22 | -       |                                                                                                                                                          |
|     | IS1G22A | I learned about as much as before the COVID-19 disruption                                                                                                |
|     | IS1G22B | I made more progress in some subjects than before the COVID-19 disruption                                                                                |
|     | IS1G22C | It became more difficult to use my teachers' feedback to improve my work                                                                                 |
|     | IS1G22D | It became more difficult to know how well I was progressing                                                                                              |
| Q23 | -       | During the COVID-19 disruption, did your school or teachers give you information on the topics listed below to support your well-being?                  |

|     |         |                                                                                                                             |
|-----|---------|-----------------------------------------------------------------------------------------------------------------------------|
|     | IS1G23A | Looking after my emotional wellbeing (e.g. relaxation methods)                                                              |
|     | IS1G23B | Looking after my personal safety                                                                                            |
|     | IS1G23C | Healthy eating                                                                                                              |
|     | IS1G23D | How to find people who can provide well-being advice                                                                        |
|     | IS1G23E | Health advice about COVID-19                                                                                                |
|     | IS1G23F | Healthy working habits (such as taking breaks when studying)                                                                |
|     | IS1G23G | Maintaining physical fitness                                                                                                |
| Q24 | -       | To what extent do you agree or disagree with the following statements about how you felt during the COVID-19 disruption?    |
|     | IS1G24A | I felt anxious about the changes in my schooling                                                                            |
|     | IS1G24B | I felt overwhelmed by what was happening in the world due to the COVID-19 pandemic                                          |
|     | IS1G24C | I felt overwhelmed by what was happening in my local area due to the COVID-19 pandemic                                      |
|     | IS1G24D | I was worried about how the disruption affected my learning                                                                 |
|     | IS1G24E | I was worried about how this disruption will affect my future education                                                     |
|     | IS1G24F | I missed my usual contact with my classmates                                                                                |
|     | IS1G24G | I felt supported by my school                                                                                               |
|     | IS1G24H | I had one or more teachers whom I felt comfortable to ask for help                                                          |
|     | IS1G24I | I could not get my usual level of support from non-teaching support staff                                                   |
|     | IS1G24J | I still felt part of the school                                                                                             |
|     | IS1G24K | I was worried about catching COVID-19                                                                                       |
|     | IS1G24L | My classmates were supportive of each other                                                                                 |
|     | IS1G24M | I found it difficult to concentrate on my schoolwork                                                                        |
| Q25 | -       | To what extent do you agree or disagree with the following statements about your well-being during the COVID-19 disruption? |
|     | IS1G25A | I exercised (including walking) more than usual                                                                             |
|     | IS1G25B | I was able to do more of my usual outside of school activities scouts, guides, training for sports                          |
|     | IS1G25C | I felt fit and healthy                                                                                                      |
|     | IS1G25D | I felt more lonely than usual                                                                                               |
|     | IS1G25E | I got upset over things that would not have normally bothered me                                                            |
|     | IS1G25F | I felt angry more often than usual                                                                                          |
|     | IS1G25G | I did not feel like contacting my friends                                                                                   |
|     | IS1G25H | I was more worried than usual about my friends and family getting sick                                                      |
|     | IS1G25I | I used social media a lot more than before the COVID-19 disruption                                                          |
|     | IS1G25J | I did not sleep as well as before the COVID-19 disruption                                                                   |
| Q26 | -       | Were you affected by any of the following situations during the COVID-19 disruption?                                        |
|     | IS1G26A | One or both of my parents/ guardians lost their job                                                                         |
|     | IS1G26B | Our family had to be more careful with money than usual.                                                                    |
|     | IS1G26C | One or both of my parents/ guardians had to work from home                                                                  |
|     | IS1G26D | One or both of my parents/ guardians were stressed about their job                                                          |
|     | IS1G26E | Our family had to move to live in a new location                                                                            |
|     | IS1G26F | I had to live away from my parents/ guardians                                                                               |

|      |          |                                                                                                                                    |
|------|----------|------------------------------------------------------------------------------------------------------------------------------------|
|      | IS1G26G  | I had to help more at home with household tasks                                                                                    |
| Q26a | -        | Do you do receive support from your school and teachers for a disability?                                                          |
| Q26b | -        | Before the COVID-19 disruption, how much support was your school giving you in the following areas?                                |
|      | IS1G26bA | How I move around: lifting and carrying things, holding things, moving from place to place, getting around your community          |
|      | IS1G26bB | How I learn: seeing, hearing, learning to read, learning to write, learning maths                                                  |
|      | IS1G26bC | How I communicate: understanding what people say, telling people what I need, speaking clearly, having conversations               |
|      | IS1G26bD | How I take care of myself: personal grooming, using the bathroom, eating and drinking, and keeping myself safe                     |
|      | IS1G26bE | How I relate to others – making friends, keeping friends, managing disagreements, understanding other points of view               |
|      | IS1G26bF | How I solve problems – solving problems, persisting, staying on task, completing tasks independently, coping with setbacks         |
| Q26c | -        | How did the support you received from your school in the following areas change during the COVID-19 disruption?                    |
|      | IS1G26cA | How I move around: lifting and carrying things, holding things, moving from place to place, getting around your community          |
|      | IS1G26cB | How I learn: seeing, hearing, learning to read, learning to write, learning maths                                                  |
|      | IS1G26cC | How I communicate: understanding what people say, telling people what I need, speaking clearly, having conversations               |
|      | IS1G26cD | How I take care of myself: personal grooming, using the bathroom, eating and drinking, and keeping myself safe                     |
|      | IS1G26cE | How I relate to others – making friends, keeping friends, managing disagreements, understanding other points of view               |
|      | IS1G26cF | How I solve problems – solving problems, persisting, staying on task, completing tasks independently, coping with setbacks         |
| Q27  | -        | To what extent do you agree or disagree with the following statements about your learning at school after the COVID-19 disruption? |
|      | IS1G27A  | I was more motivated to learn when school reopened than at any other time                                                          |
|      | IS1G27B  | I worried a lot about catching COVID-19 at school                                                                                  |
|      | IS1G27C  | I found it hard to manage the COVID-19 routines at school (e.g. wearing a mask, social distancing)                                 |
|      | IS1G27D  | I found it hard to concentrate during class time                                                                                   |
|      | IS1G27E  | I felt that I had fallen behind in my learning compared to other students                                                          |
|      | IS1G27F  | I had to complete more assessments than usual                                                                                      |
|      | IS1G27G  | I was excited to catch up with friends                                                                                             |
|      | IS1G27H  | My classmates were friendlier than before the COVID-19 disruption                                                                  |
|      | IS1G27I  | My teachers seemed more caring towards me than they were before the COVID-19 disruption                                            |
|      | IS1G27J  | I felt safe at school                                                                                                              |
| Q28  | -        | To what extent do you agree or disagree with the following statements about your school experiences after the COVID-19 disruption? |
|      | IS1G28A  | I understood the changed arrangements in my school                                                                                 |
|      | IS1G28B  | My teachers went over the work we did during the COVID-19 disruption                                                               |
|      | IS1G28C  | We rushed through a lot of new schoolwork                                                                                          |
|      | IS1G28D  | My class was less well-behaved than before the COVID-19 disruption                                                                 |
|      | IS1G28E  | Staff from my school other than my teacher came to my class to ask about our well-being                                            |
|      | IS1G28F  | We were reminded that school counsellors and support officers were available for individual appointments                           |
|      | IS1G28G  | Extra tuition was available to catch up on schoolwork                                                                              |
|      | IS1G28H  | It was easier for me to access free lunches and/or breakfast than before the COVID-19 disruption                                   |
| Q29  | -        | How confident are you now about the following aspects of your schoolwork?                                                          |
|      | IS1G29A  | Using videoconferencing software such as Zoom or MS Teams                                                                          |
|      | IS1G29B  | Finding learning resources on my own                                                                                               |
|      | IS1G29C  | Planning when to do schoolwork on my own                                                                                           |
|      | IS1G29D  | Completing schoolwork independently                                                                                                |
|      | IS1G29E  | Assessing my learning progress                                                                                                     |

|      |          |                                                                                                                               |
|------|----------|-------------------------------------------------------------------------------------------------------------------------------|
|      | IS1G29F  | Seeking assistance from others when I need it                                                                                 |
|      | IS1G29G  | Using a learning management system or school learning platform (e.g. Seesaw)                                                  |
| Q30  | IS1G30   | Overall, how prepared do you feel for learning from home if your school building closed for an extended period in the future? |
| Q31  | -        | When were you born?                                                                                                           |
|      | IS1G31A  | Month                                                                                                                         |
|      | IS1G31B  | Year                                                                                                                          |
| Q32  | IS1G32   | Are you a girl or a boy?                                                                                                      |
| Q33  | -        | Do any of these people live at home with you most or all of the time?                                                         |
|      | IS1G33A  | Parent 1/Guardian 1 (for example, step-parent or foster parent)                                                               |
|      | IS1G33B  | Parent 2/Guardian 2 (for example, step-parent or foster parent)                                                               |
|      | IS1G33C  | Older siblings/or same age siblings (brothers or sisters including step-brothers and step-sisters)                            |
|      | IS1G33D  | Younger siblings (brothers or sisters including step-brothers and step-sisters)                                               |
|      | IS1G33E  | Grandparents                                                                                                                  |
|      | IS1G33F  | Others                                                                                                                        |
| Q33a | IS1G33aA | What best describes you?                                                                                                      |
| Q34  | IS1G34   | What language do you speak at home most of the time?                                                                          |
| Q35  | -        | How many of the following ICT devices are currently used in your home?                                                        |
|      | IS1G35A  | Desktop or laptop computers                                                                                                   |
|      | IS1G35B  | Tablet devices (e.g. iPad, Tablet PC)                                                                                         |
|      | IS1G35C  | Smart phones                                                                                                                  |
| Q36  | -        | Do you have any of these things at your home?                                                                                 |
|      | IS1G36A  | Study desk/table for your use                                                                                                 |
|      | IS1G36B  | Books of your very own (do not count your school books)                                                                       |
|      | IS1G36C  | Your own room                                                                                                                 |
|      | IS1G36D  | Internet connection                                                                                                           |
|      | IS1G36E  | country-specific indicator of wealth                                                                                          |
|      | IS1G36F  | country-specific indicator of wealth                                                                                          |
|      | IS1G36G  | country-specific indicator of wealth                                                                                          |
|      | IS1G36H  | country-specific indicator of wealth                                                                                          |
|      | IS1G36I  | country-specific indicator of wealth                                                                                          |
|      | IS1G36J  | country-specific indicator of wealth                                                                                          |
| Q36  | IS1G36   | About how many books are there in your home?                                                                                  |
| Q37  | IS1G37   | What kind of work does your parent or guardian 1 do for his/her main job?                                                     |
| Q38  | IS1G38   | What is the highest level of education completed by your parent or guardian 1?                                                |
| Q39  | IS1G39   | What kind of work does your parent or guardian 2 do for his/her main job?                                                     |
| Q40  | IS1G40   | What is the highest level of education completed by your parent or guardian 2?                                                |

**Table S2.** The importance levels of the variables ordered according to the Borda method.

| Rank | Variable (DM) | Variable (DMI) | Rank | Variable (DM) | Variable (DMI) | Rank | Variable (DM) | Variable (DMI) |
|------|---------------|----------------|------|---------------|----------------|------|---------------|----------------|
| 1    | IS1G27B       | IS1G27B        | 61   | IS1G29B       | IS1G28D        | 121  | IS1G20A       | IS1G09J        |
| 2    | IS1G22D       | IS1G27A        | 62   | IS1G40        | IS1G23C        | 122  | IS1G12D       | IS1G11B        |
| 3    | IS1G27G       | IS1G27G        | 63   | IS1G03        | IS1G17C        | 123  | IS1G33A       | IS1G13B        |
| 4    | IS1G30        | IS1G22D        | 64   | IS1G18J       | IS1G26C        | 124  | IS1G15D       | IS1G07E        |
| 5    | IS1G27A       | IS1G30         | 65   | IS1G16F       | IS1G19B        | 125  | IS1G09H       | IS1G13F        |
| 6    | IS1G22A       | IS1G01         | 66   | IS1G06        | IS1G14F        | 126  | IS1G17E       | IS1G05B        |
| 7    | IS1G28A       | IS1G26B        | 67   | IS1G02C       | IS1G20C        | 127  | IS1G10H       | IS1G21C        |
| 8    | IS1G26B       | IS1G27E        | 68   | IS1G28G       | IS1G04E        | 128  | IS1G09F       | IS1G09K        |
| 9    | IS1G23E       | IS1G22A        | 69   | IS1G29D       | IS1G10J        | 129  | IS1G16C       | IS1G16C        |
| 10   | IS1G17F       | IS1G27I        | 70   | IS1G21D       | IS1G21B        | 130  | IS1G20D       | IS1G20E        |
| 11   | IS1G26D       | IS1G28A        | 71   | IS1G16E       | IS1G17E        | 131  | IS1G09B       | IS1G12F        |
| 12   | IS1G27C       | IS1G17F        | 72   | IS1G36        | IS1G29B        | 132  | IS1G14C       | IS1G23A        |
| 13   | IS1G27E       | IS1G21G        | 73   | IS1G17C       | IS1G21A        | 133  | IS1G21C       | IS1G04B        |
| 14   | IS1G28B       | IS1G27C        | 74   | IS1G21E       | IS1G23D        | 134  | IS1G09G       | IS1G18D        |
| 15   | IS1G27I       | IS1G26D        | 75   | IS1G21B       | IS1G19C        | 135  | IS1G02A       | IS1G19E        |
| 16   | IS1G23B       | IS1G14G        | 76   | IS1G18C       | IS1G10I        | 136  | IS1G09C       | IS1G16H        |
| 17   | IS1G28C       | IS1G28B        | 77   | IS1G17D       | IS1G14D        | 137  | IS1G19E       | IS1G38         |
| 18   | IS1G14G       | IS1G21F        | 78   | IS1G12C       | IS1G29C        | 138  | IS1G07F       | IS1G09D        |
| 19   | IS1G21G       | IS1G22C        | 79   | IS1G21A       | IS1G07H        | 139  | IS1G09J       | IS1G13C        |
| 20   | IS1G14B       | IS1G07D        | 80   | IS1G19I       | IS1G28F        | 140  | IS1G18D       | IS1G19A        |
| 21   | IS1G22C       | IS1G23E        | 81   | IS1G26A       | IS1G20D        | 141  | IS1G10G       | IS1G09G        |
| 22   | IS1G34        | IS1G04C        | 82   | IS1G04A       | IS1G17D        | 142  | IS1G09A       | IS1G17A        |
| 23   | IS1G32        | IS1G14B        | 83   | IS1G23F       | IS1G04A        | 143  | IS1G16H       | IS1G07I        |
| 24   | IS1G07D       | IS1G23B        | 84   | IS1G35A       | IS1G35A        | 144  | IS1G33E       | IS1G02A        |
| 25   | IS1G27H       | IS1G29F        | 85   | IS1G20C       | IS1G14H        | 145  | IS1G21H       | IS1G09E        |
| 26   | IS1G29F       | IS1G28C        | 86   | IS1G13F       | IS1G18E        | 146  | IS1G07C       | IS1G13D        |
| 27   | IS1G18F       | IS1G04D        | 87   | IS1G28F       | IS1G18C        | 147  | IS1G11D       | IS1G20A        |
| 28   | IS1G22B       | IS1G27H        | 88   | IS1G04B       | IS1G36         | 148  | IS1G15A       | IS1G07F        |
| 29   | IS1G29A       | IS1G14I        | 89   | IS1G13A       | IS1G12D        | 149  | IS1G13C       | IS1G09F        |
| 30   | IS1G16D       | IS1G34         | 90   | IS1G15C       | IS1G14C        | 150  | IS1G02B       | IS1G10F        |
| 31   | IS1G18A       | IS1G18F        | 91   | IS1G38        | IS1G09H        | 151  | IS1G19B       | IS1G09B        |
| 32   | IS1G21F       | IS1G29A        | 92   | IS1G33F       | IS1G02C        | 152  | IS1G07I       | IS1G05C        |
| 33   | IS1G23G       | IS1G28H        | 93   | IS1G01        | IS1G16E        | 153  | IS1G12A       | IS1G10C        |
| 34   | IS1G27D       | IS1G18A        | 94   | IS1G09E       | IS1G08         | 154  | IS1G18G       | IS1G18I        |
| 35   | IS1G28H       | IS1G32         | 95   | IS1G09I       | IS1G29E        | 155  | IS1G05C       | IS1G10D        |
| 36   | IS1G37        | IS1G03         | 96   | IS1G27J       | IS1G15C        | 156  | IS1G11A       | IS1G33D        |
| 37   | IS1G07G       | IS1G14A        | 97   | IS1G16B       | IS1G12G        | 157  | IS1G05B       | IS1G05A        |
| 38   | IS1G18H       | IS1G40         | 98   | IS1G20B       | IS1G29D        | 158  | IS1G18I       | IS1G15D        |
| 39   | IS1G04C       | IS1G22B        | 99   | IS1G14H       | IS1G12A        | 159  | IS1G10E       | IS1G33B        |
| 40   | IS1G23C       | IS1G14E        | 100  | IS1G10J       | IS1G07G        | 160  | IS1G09D       | IS1G33E        |
| 41   | IS1G14A       | IS1G28E        | 101  | IS1G11B       | IS1G23F        | 161  | IS1G16G       | IS1G18G        |
| 42   | IS1G07A       | IS1G19H        | 102  | IS1G08        | IS1G19F        | 162  | IS1G17A       | IS1G19D        |
| 43   | IS1G14E       | IS1G27D        | 103  | IS1G12F       | IS1G12C        | 163  | IS1G13E       | IS1G09A        |
| 44   | IS1G04E       | IS1G07A        | 104  | IS1G10C       | IS1G20B        | 164  | IS1G17B       | IS1G10H        |
| 45   | IS1G26E       | IS1G28G        | 105  | IS1G19F       | IS1G13A        | 165  | IS1G35B       | IS1G16B        |
| 46   | IS1G27F       | IS1G26E        | 106  | IS1G07H       | IS1G10A        | 166  | IS1G10A       | IS1G10K        |
| 47   | IS1G10I       | IS1G07C        | 107  | IS1G12G       | IS1G26F        | 167  | IS1G13D       | IS1G13E        |
| 48   | IS1G14F       | IS1G12E        | 108  | IS1G13B       | IS1G26A        | 168  | IS1G33D       | IS1G11A        |
| 49   | IS1G04D       | IS1G23G        | 109  | IS1G20E       | IS1G35C        | 169  | IS1G15B       | IS1G16A        |
| 50   | IS1G28D       | IS1G16D        | 110  | IS1G14D       | IS1G09I        | 170  | IS1G07E       | IS1G15B        |

|    |         |         |     |         |         |     |         |         |
|----|---------|---------|-----|---------|---------|-----|---------|---------|
| 51 | IS1G35C | IS1G06  | 111 | IS1G10D | IS1G21H | 171 | IS1G19D | IS1G11D |
| 52 | IS1G23D | IS1G18H | 112 | IS1G26C | IS1G07B | 172 | IS1G16A | IS1G02B |
| 53 | IS1G19H | IS1G16F | 113 | IS1G19C | IS1G12B | 173 | IS1G10K | IS1G33F |
| 54 | IS1G29C | IS1G37  | 114 | IS1G23A | IS1G10B | 174 | IS1G33B | IS1G33A |
| 55 | IS1G12E | IS1G27F | 115 | IS1G09K | IS1G21D | 175 | IS1G07B | IS1G35B |
| 56 | IS1G14I | IS1G27J | 116 | IS1G26F | IS1G17B | 176 | IS1G05A | IS1G10E |
| 57 | IS1G28E | IS1G33C | 117 | IS1G19A | IS1G09C | 177 | IS1G10B | IS1G16G |
| 58 | IS1G39  | IS1G18J | 118 | IS1G18E | IS1G18B | 178 | IS1G18B | IS1G15A |
| 59 | IS1G33C | IS1G39  | 119 | IS1G10F | IS1G10G |     |         |         |
| 60 | IS1G29E | IS1G21E | 120 | IS1G12B | IS1G19I |     |         |         |

---
